# Supplementary material for: Assessing the Impact of Different Irrigation Levels on Starch Potato Production
Source: MDPI journal article supplement (doi:10.3390/agronomy12112685), 2022-10-29
Supplement: s1 [file s1]

Archive with 2 entries (2 files):
- Table S1.pdf
- Table S2.pdf
